# Supplementary material
Source: PubMed Central journal article supplement (PMC7610192)
Supplement: jama-e2018977-s003.pdf [file jama-e2018977-s003.pdf]

## **Data Sharing Statement**

Baer. Effect of an Online Weight Management Program Integrated With Population Health Management on Weight Change. *JAMA*. Published November 03, 2020. 10.1001/jama.2020.18977

### **Data**

**Data available:** No

### **Additional Information**

**Explanation for why data not available:** We are still conducting secondary analyses.
